# Supplementary material for: Predicting spatial variability of species diversity with the minimum data set of soil properties in an arid desert riparian forest
Source: Front Plant Sci. 2022 Nov 11;13:1014643. doi: 10.3389/fpls.2022.1014643 (PMC9691764; doi:10.3389/fpls.2022.1014643)
Supplement: Supplementary file 1 [file DataSheet_1.docx]

**Predicting spatial variability of species diversity with the minimum data set of soil properties in an arid desert riparian forest**

Xiaotong Li1,2,3†, Yudong Chen1,2,3†, Guanghui Lv1,2,3*, Jinlong Wang1,2,3, Lamei Jiang1,2,3, Hengfang Wang1,2,3, Xiaodong Yang4*

1 College of Ecology and Environment, Xinjiang University, Xinjiang, China;

2 Key Laboratory of Oasis Ecology of Education Ministry, Xinjiang University, Xinjiang, China;

3 Xinjiang Jinghe Observation and Research Station of Temperate Desert Ecosystem, Ministry of Education, Jinghe, China.

4 School of Civil & Environmental Engineering and Geography Science, Ningbo University, Ningbo, China.

† Those authors contributed equally.

*Correspondence: Guanghui Lv, guanghui_xju@sina.com; and Xiaodong Yang, xjyangxd@sina.com

**Table S1** Frequency of plant species in study area

| Species | Frequency | Species | Frequency |
| --- | --- | --- | --- |
| *Phragmites australis* | 91.71% | *Suaeda microphylla* | 0.19% |
| *Apocynum venetum* | 2.90% | *Alhagi sparsifolia* | 0.12% |
| *Halimodendron halodendron* | 1.76% | *Reaumuria soongorica* | 0.11% |
| *Nitraria tangutorum* | 1.71% | *Haloxylon ammodendron* | 0.04% |
| *Achnatherum splendens* | 0.72% | *Salsola collina* | 0.04% |
| *Lycium ruthenicum* | 0.42% | *Sonchus oleraceus* | 0.03% |
| *Populus euphratica* | 0.23% | *Glycyrrhiza uralensis* | 0.02% |

**TABLE S2** Parameters of semi-variograms tested using the RF models.

| Indices | Variables | Model | C0  (Nugget) | C0+C (Sill) | C0/(C0+C) (%) | Range (m) | *R2* | *RSS* |
| --- | --- | --- | --- | --- | --- | --- | --- | --- |
| Shannon–Wiener | Original | Exp | 0.43×10-2 | 0.08 | 5.38*** | 0.72 | 0.42 | 2.24×10-4 |
| Lin | 7.00×10-2 | 0.09 | 77.78* | 12.31 | 0.38 | 8.36×10-5 |
| Sph | 0 | 0.08 | 0*** | 1.80 | 0.33 | 2.85×10-4 |
| Gau | 0.50×10-2 | 0.08 | 6.25*** | 0.88 | 0.33 | 2.57×10-1 |
| RF-pre | Exp | 0.28×10-2 | 0.03 | 9.33*** | 0.82 | 0.46 | 3.86×10-5 |
| Lin | 2.60×10-2 | 0.03 | 8.67*** | 12.31 | 0.38 | 8.83×10-6 |
| Sph | 0 | 0.03 | 0*** | 1.86 | 0.33 | 4.69×10-5 |
| Gau | 0.20×10-2 | 0.03 | 6.67*** | 0.92 | 0.34 | 4.66×10-5 |
| Simpson | Original | Exp | 0.14×10-2 | 0.03 | 4.70*** | 0.77 | 0.37 | 4.20×10-5 |
| Lin | 2.40×10-2 | 0.03 | 8*** | 12.31 | 0.31 | 1.26×10-5 |
| Sph | 0 | 0.03 | 0*** | 1.82 | 0.27 | 4.78×10-5 |
| Gau | 0.10×10-2 | 0.03 | 3.33 | 0.89 | 0.27 | 4.77×10-5 |
| RF-pre | Exp | 0.60×10-3 | 0.01 | 6.00*** | 0.90 | 0.42 | 7.23×10-6 |
| Lin | 0.90×10-2 | 0.01 | 90* | 12.31 | 0.29 | 1.31×10-6 |
| Sph | 0 | 0.01 | 0*** | 1.90 | 0.28 | 8.71×10-6 |
| Gau | 0 | 0.01 | 0*** | 0.93 | 0.28 | 8.67×10-6 |
| Pielou | Original | Exp | 0.25×10-2 | 0.06 | 4.17*** | 0.77 | 0.27 | 2.44×10-4 |
| Lin | 4.90×10-2 | 0.07 | 7*** | 12.31 | 0.16 | 4.67×10-5 |
| Sph | 0 | 0.06 | 0*** | 1.77 | 0.18 | 2.72×10-4 |
| Gau | 0.20×10-2 | 0.06 | 3.33 | 0.86 | 0.18 | 2.72×10-4 |
| RF-pre | Exp | 0.13×10-2 | 0.02 | 6.50*** | 0.95 | 0.34 | 3.99×10-5 |
| Lin | 1.70×10-2 | 0.02 | 85.00* | 0.30 | 0.31 | 5.10×10-6 |
| Sph | 0 | 0.02 | 0*** | 1.00 | 0.18 | 4.72×10-5 |
| Gau | 0 | 0.02 | 0*** | 0.99 | 0.19 | 4.71×10-6 |

Exp, exponential model; Lin, linear model; Sph, spherical model; Gau, gaussian model. C0/(C0+C) < 25% (***), 25% < C0/(C0+C) < 75% (**), and C0/(C0+C) > 75% (*) suggest a strong, moderate, and weak spatial dependence, respectively.


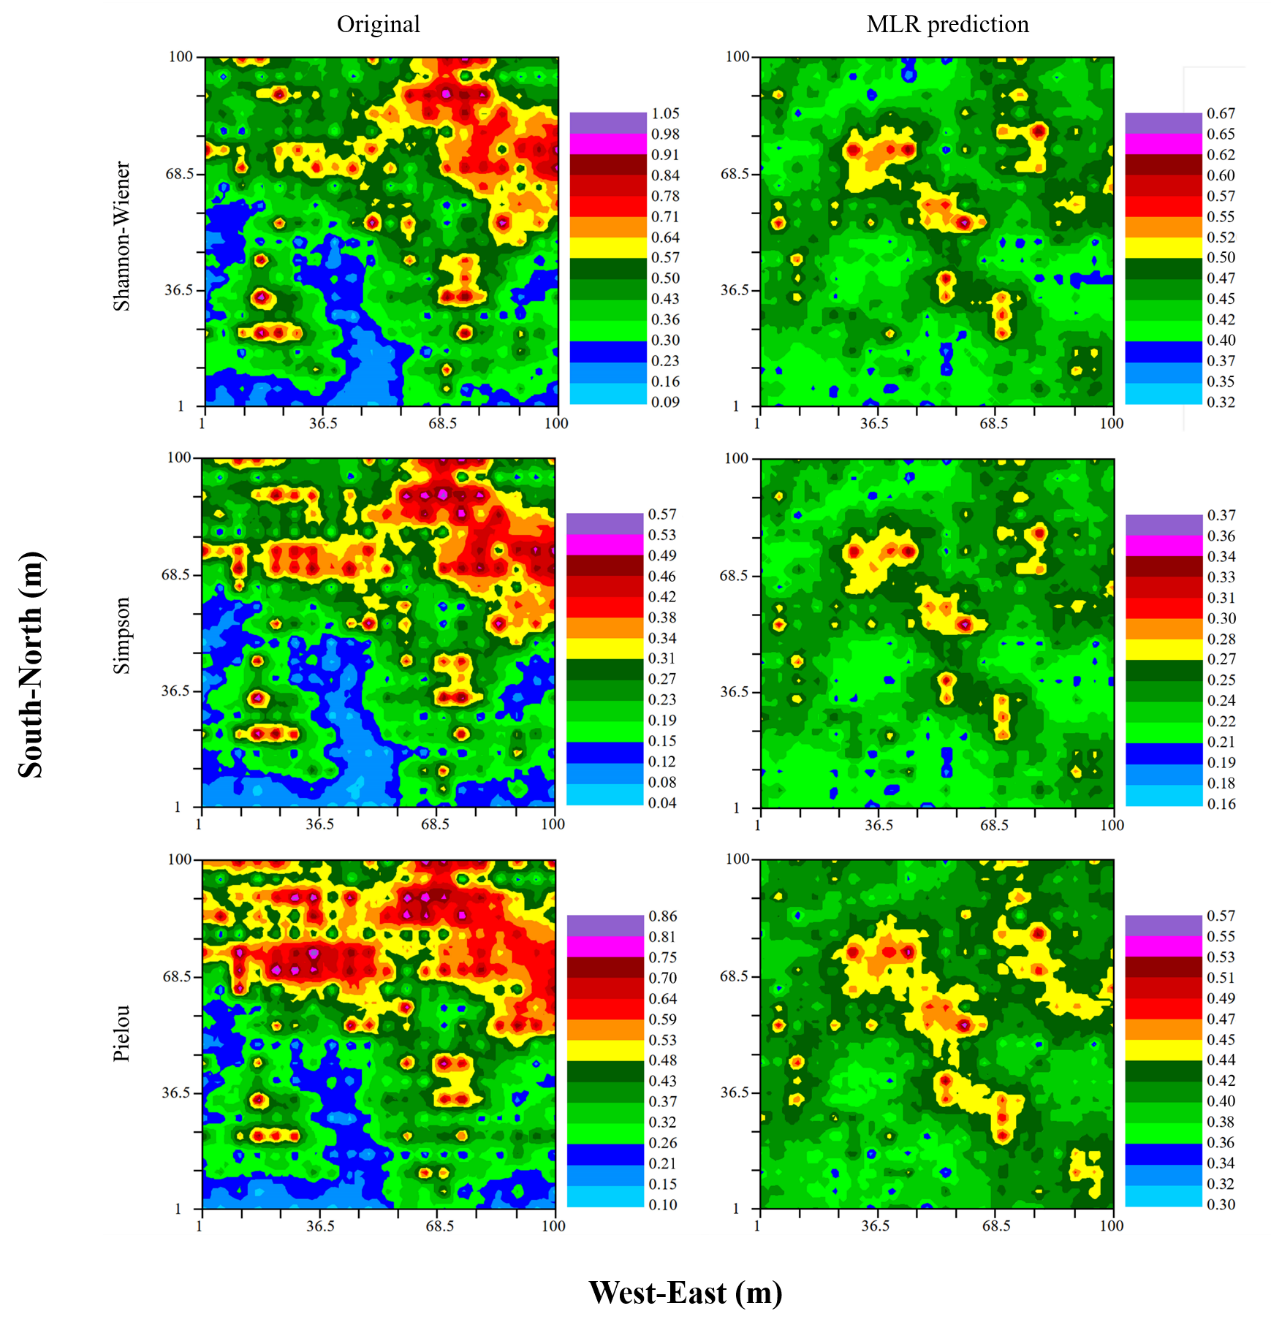


**Figure S1** Spatial variations in species diversity interpolated using the original (left) and MLR-predicted values (right), respectively.
